# Supplementary material for: Robust phylogenetic profile clustering for Saccharomyces cerevisiae proteins
Source: PeerJ journal article supplement (doi:10.7717/peerj.19370), 2025-04-28

**Suppl. Figure: Distributions of profile mismatches (PMs) versus two randomly-generated profiles**

This distributions are the same as for the PM distribution figure in the main text, except that in (A) the comparison is to a randomly-generated profile with a 0.25 chance of a 1 character, and in (B) with a 0.75 chance. The labelling is as in Figure 1

**(A) Random profile, 0.25 chance of 1, 0.75 chance of 0**

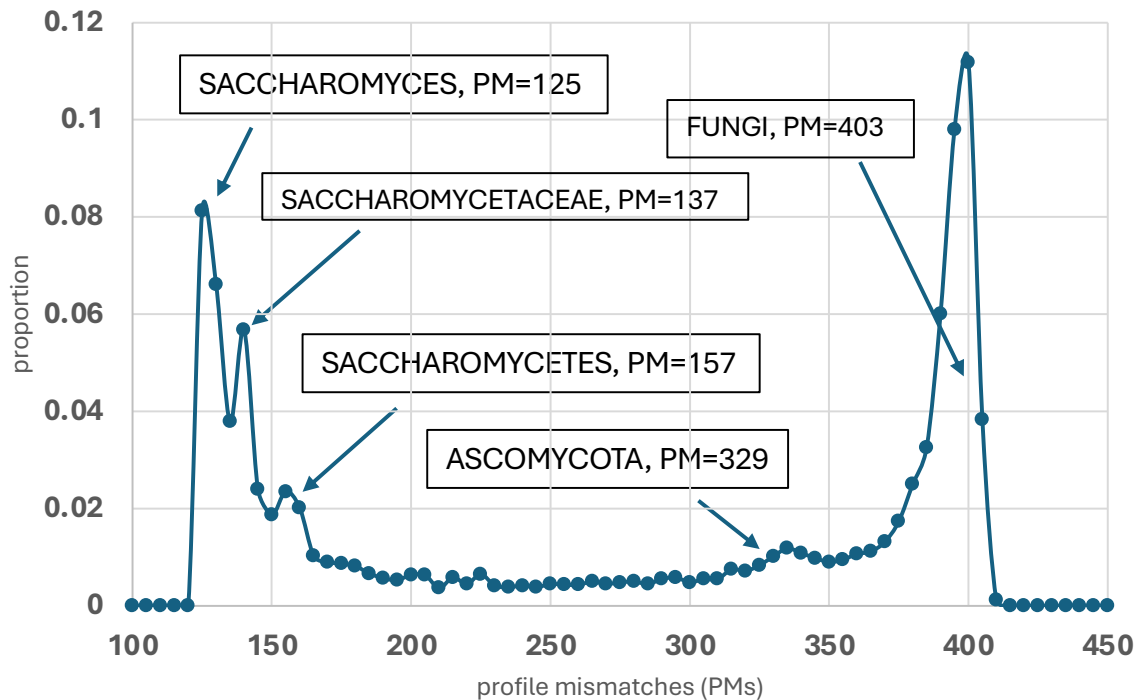

**(B) Random profile, 0.75 chance of 1, 0.25 chance of 0**

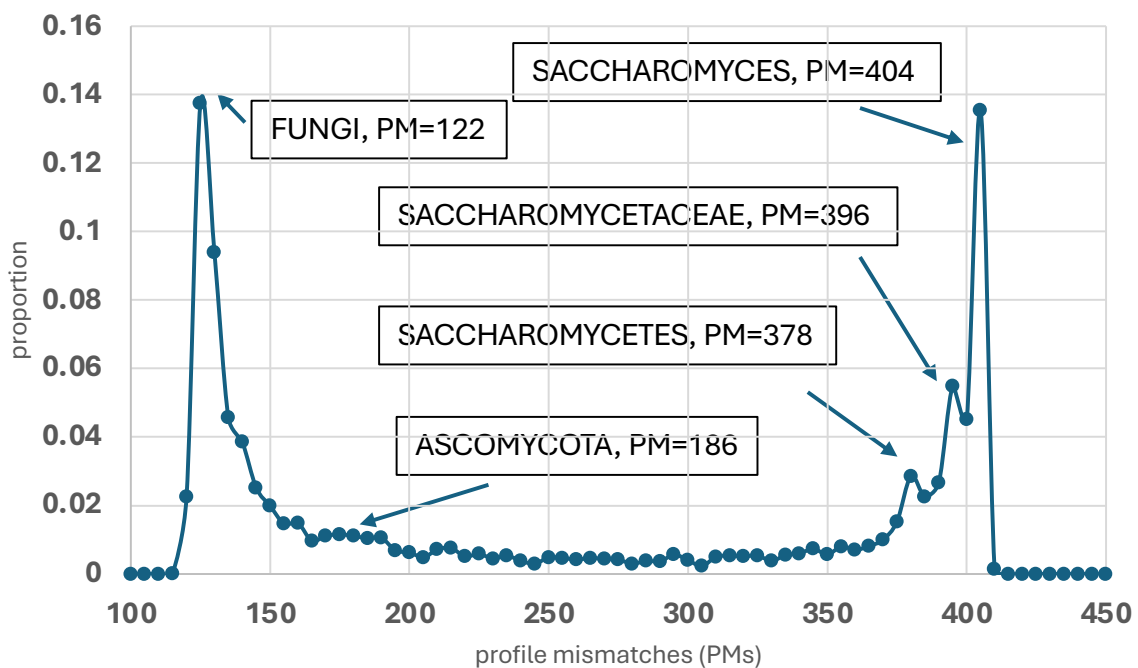

Supplement: FigureS1.pdf [file FigureS1.pdf]
